# Supplementary material for: Preparation of W/O Hypaphorine–Chitosan Nanoparticles and Its Application on Promoting Chronic Wound Healing via Alleviating Inflammation Block
Source: MDPI journal article supplement (doi:10.3390/nano11112830), 2021-10-25
Supplement: s1 [file s1]

### **Main components of Hua Tuo Lithospermum burn ointment**

The main components of Hua Tuo Lithospermum burn ointment (HT) are Lithospermum, borneol, Coptis, Sophora flavescens, lanolin, Phellodendron chinense, allantoin and vaseline.
